# Supplementary material for: Thermal activation of methane by vanadium boride cluster cations VBn+ (n = 3–6)
Source: Royal Society of Chemistry journal article supplement (doi:10.1039/c8cp00071a), 2018-01-01
Supplement: c8cp00071a1.pdf [file c8cp00071a1.pdf]

## Supplementary Information

### Thermal Activation of Methane by Vanadium Boride Cluster Cations $\text{VB}_n^+$ ( $n = 3-6$ )

Qiang Chen,<sup>ab</sup> Yan-Xiao Zhao,<sup>\*ab</sup> Li-Xue Jiang,<sup>abc</sup> Hai-Fang Li,<sup>ab</sup> Jiao-Jiao Chen,<sup>abc</sup>  
Ting Zhang,<sup>abc</sup> Qing-Yu Liu,<sup>ab</sup> and Sheng-Gui He<sup>\*abc</sup>

<sup>a</sup> *State Key Laboratory for Structural Chemistry of Unstable and Stable Species, Institute of  
Chemistry, Chinese Academy of Sciences, Beijing 100190, China*

<sup>b</sup> *Beijing National Laboratory for Molecular Sciences, CAS Research/Education Center of  
Excellence in Molecular Sciences, Beijing 100190, China*

<sup>c</sup> *University of Chinese Academy of Sciences, Beijing 100049, China*

E-mail: chemzyx@iccas.ac.cn, shengguihe@iccas.ac.cn.

**Experimental and Theoretical methods.** (page S2)

**Table S1.** Experimental and calculated bond dissociation energies. (page S3)

**Figure S1.** Reaction kinetic for  $\text{VB}_3^+ + \text{CH}_4$ . (page S4)

**Figure S2.** TOF-MS for reactions of  $\text{VB}_n^+$  ( $n = 4-6$ ) with  $\text{CH}_4$ . (page S5)

**Figure S3.** Low-lying isomers of  $\text{VB}_3^+$ ,  $\text{VB}_3\text{CH}_2^+$  and  $\text{B}_3\text{CH}_3$ . (page S6)

**Figure S4.** Pathway for the reaction of  $\text{VB}_3^+ + \text{CH}_4$  starting from the  $\text{B}_3$  moiety. (page S7)

**Figure S5.** Pathway for the reaction of  $\text{VB}_3^+ + \text{CH}_4$  starting from the V atom. (page S8)

**Figure S6.** Details of the crossing points (CP1 and CP2) in Figures S5 and S6. (page S9)

**Figure S7.** Pathway for the reaction of  $\text{B}_3 + \text{CH}_4$ . (page S10)

## Experimental and Theoretical methods

The  $\text{VB}_n^+$  clusters were generated by laser ablation of a rotating and translating V/B mixed disk (V/B molar ratio of 1:10) in the presence of pure He carrier gas (99.999%) with the backing pressure of 6.5 atm. The clusters of interest [ $\text{VB}_n^+$  ( $n = 3-6$ )] were mass-selected by a quadrupole mass filter and entered into a linear ion trap (LIT) reactor, where they were thermalized by collisions with a pulse of He gas and then interacted with a pulse of Ar,  $\text{CH}_4$ , or  $\text{CD}_4$  for around 1.9 ms. The ions ejected from the LIT were detected by a reflectron time-of-flight mass spectrometer. The details of running the time-of-flight mass spectrometer,<sup>S1</sup> quadrupole mass filter,<sup>S2</sup> and the LIT<sup>S3</sup> can be found in our previous works.

Density functional theory (DFT) calculations using Gaussian 09 package<sup>S4</sup> were carried out to investigate the structures of  $\text{VB}_3^+$  and the reaction mechanism of  $\text{VB}_3^+$  with  $\text{CH}_4$ . The reaction mechanism of  $\text{B}_3 + \text{CH}_4$  was also studied for comparison. In order to find an appropriate functional, the bond dissociation energies (BDEs) of V–C, V–H, B–C, B–H, C–H and H–H were computed by various functionals with TZVP basis sets<sup>S5</sup> and compared with available experimental data<sup>S6</sup> (Table S1). It turns out that M06L functional<sup>S7</sup> was the overall best functional, thus the M06L results were given throughout this work. A Fortran code<sup>S8</sup> based on the genetic algorithm was used to search the global minimum structures of  $\text{VB}_3^+$ ,  $\text{VB}_3\text{CH}_2^+$  and  $\text{B}_3\text{CH}_3$  with different spin multiplicities. The reaction mechanism calculations involved geometry optimization of reaction intermediates and transition states (TSs). The initial guess structures of the TS species were obtained through relaxed potential energy surface scans using a single or multiple internal coordinates.<sup>S9</sup> The TSs were optimized with Broyden algorithm.<sup>S10</sup> Vibrational frequency calculations were performed to check that reaction intermediates and TSs have zero and one imaginary frequencies, respectively. The intrinsic reaction coordinate (IRC)<sup>S11</sup> calculations were carried out to make sure that each TS connects two appropriate minima. The zero-point vibration corrected energies ( $\Delta H_0$ ) were reported in this work. The NBO 3.1 program<sup>S12</sup> was used to calculate the natural atomic charges.

**Table S1.** Experimental and DFT calculated bond dissociation energies (BDEs) of V–C, V–H, B–C, B–H, C–H, and H–H. The values are given in unit of eV.

|                             | BDEs / eV   |             |             |             |             |             |             | Average deviation / eV |
|-----------------------------|-------------|-------------|-------------|-------------|-------------|-------------|-------------|------------------------|
|                             | V–B         | V–C         | V–H         | B–C         | B–H         | C–H         | H–H         | All species            |
| <b>Expt.<sup>[S6]</sup></b> | –           | <b>4.43</b> | <b>2.16</b> | <b>4.64</b> | <b>3.52</b> | <b>3.51</b> | <b>4.52</b> |                        |
| <b>M06L</b>                 | <b>2.31</b> | <b>4.41</b> | <b>2.53</b> | <b>4.81</b> | <b>3.39</b> | <b>3.36</b> | <b>4.22</b> | <b>-0.01 ± 0.24</b>    |
| B3LYP                       | 2.12        | 3.26        | 2.79        | 4.37        | 3.48        | 3.49        | 4.50        | -0.15 ± 0.58           |
| BP86                        | 2.79        | 4.82        | 2.84        | 4.82        | 3.51        | 3.60        | 4.56        | 0.23 ± 0.26            |
| B1LYP                       | 1.98        | 3.44        | 2.77        | 4.23        | 3.42        | 3.42        | 4.44        | -0.18 ± 0.52           |
| BPW91                       | 2.55        | 4.53        | 2.57        | 4.80        | 3.35        | 3.42        | 4.31        | 0.03 ± 0.24            |
| X3LYP                       | 2.11        | 3.22        | 2.80        | 4.37        | 3.47        | 3.48        | 4.47        | -0.16 ± 0.60           |
| B3P86                       | 2.22        | 3.91        | 2.74        | 4.64        | 3.54        | 3.58        | 4.58        | 0.04 ± 0.35            |
| B3PW91                      | 2.08        | 3.62        | 2.55        | 4.56        | 3.39        | 3.41        | 4.37        | -0.15 ± 0.38           |
| B1B95                       | 1.90        | 3.51        | 2.53        | 4.47        | 3.40        | 3.35        | 4.38        | -0.19 ± 0.41           |
| PBE1PBE                     | 2.08        | 3.50        | 2.51        | 4.59        | 3.34        | 3.38        | 4.25        | -0.20 ± 0.42           |
| BPBE                        | 2.55        | 4.54        | 2.56        | 4.80        | 3.34        | 3.41        | 4.29        | 0.03 ± 0.24            |
| M06                         | 2.13        | 3.69        | 2.60        | 4.48        | 3.53        | 3.42        | 4.38        | -0.11 ± 0.38           |
| M062X                       | 1.39        | 2.89        | 2.36        | 4.58        | 3.50        | 3.38        | 4.41        | -0.28 ± 0.63           |
| BLYP                        | 2.67        | 4.69        | 2.87        | 4.55        | 3.45        | 3.50        | 4.47        | 0.13 ± 0.31            |
| TPSS                        | 2.69        | 4.52        | 2.92        | 4.61        | 3.51        | 3.57        | 4.62        | 0.16 ± 0.30            |
| PBE                         | 2.89        | 4.86        | 2.73        | 4.94        | 3.37        | 3.46        | 4.27        | 0.14 ± 0.34            |

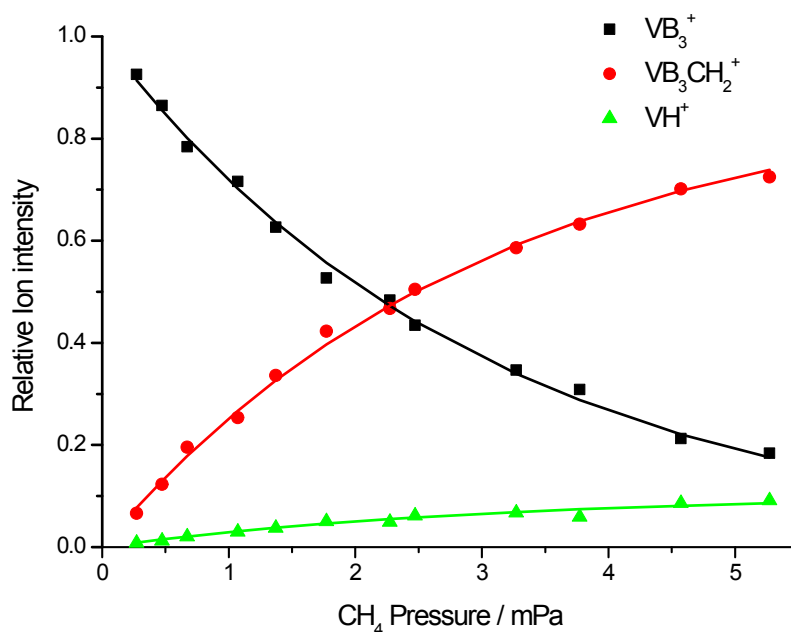

**Figure S1.** Variations of relative ion intensities with respect to the CH<sub>4</sub> pressure in the reaction of VB<sub>3</sub><sup>+</sup> with CH<sub>4</sub>.

The relative intensities of the reactant ions ( $I_R$ , VB<sub>3</sub><sup>+</sup>) and product ions ( $I_P$ , VB<sub>3</sub>CH<sub>2</sub><sup>+</sup> and VH<sup>+</sup>) can be fitted by using the following equations:

$$\ln \frac{I_R}{I_R + I_P} = -k_1 \frac{P}{k_B T} t_R$$

where  $k_1$  is the pseudo first-order rate constant,  $P$  is the pressure of the reactant molecules (CH<sub>4</sub>),  $k_B$  is the Boltzmann constant,  $T$  is the temperature (~300 K), and  $t_R$  is the interaction time (~ 1.9 ms).

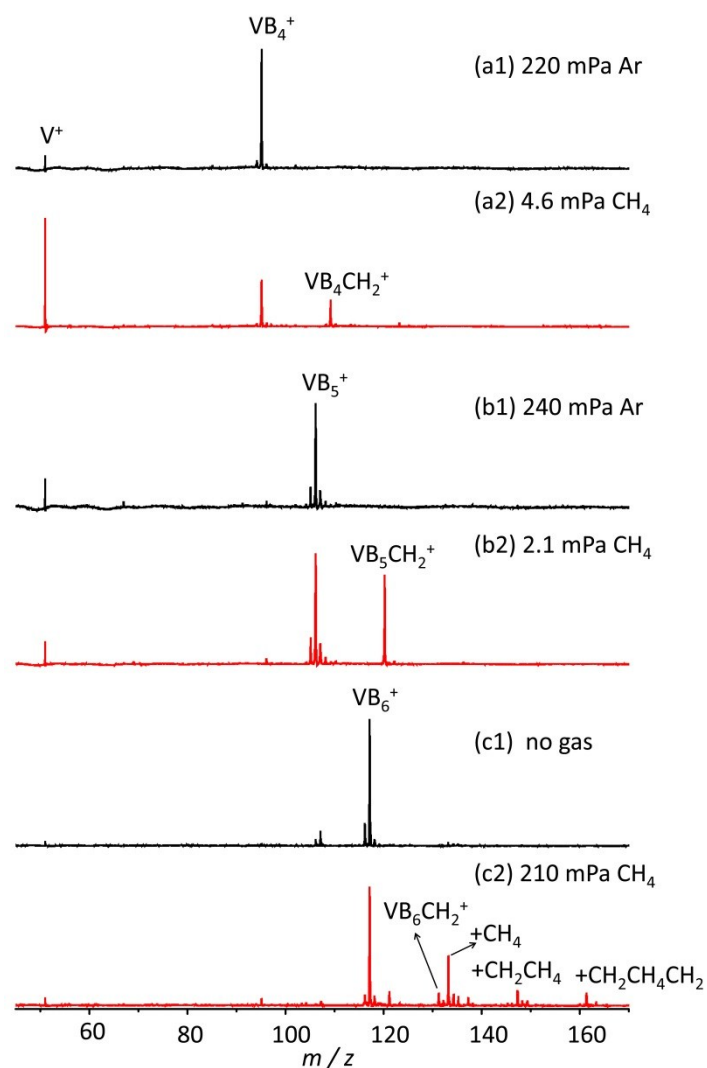

**Figure S2.** The time-of-flight (TOF) mass spectra for reactions of mass-selected  $VB_n^+$  ( $n = 4-6$ ) with Ar (a1 and b1) and  $CH_4$  (a2, b2 and c2) in an ion trap reactor for about 1.9 ms. The peaks marked with +X ( $X = CH_4, CH_2CH_4,$  and  $CH_2CH_4CH_2$ ) in c2 denote  $VB_6X^+$ . The reactant gas pressures are given.

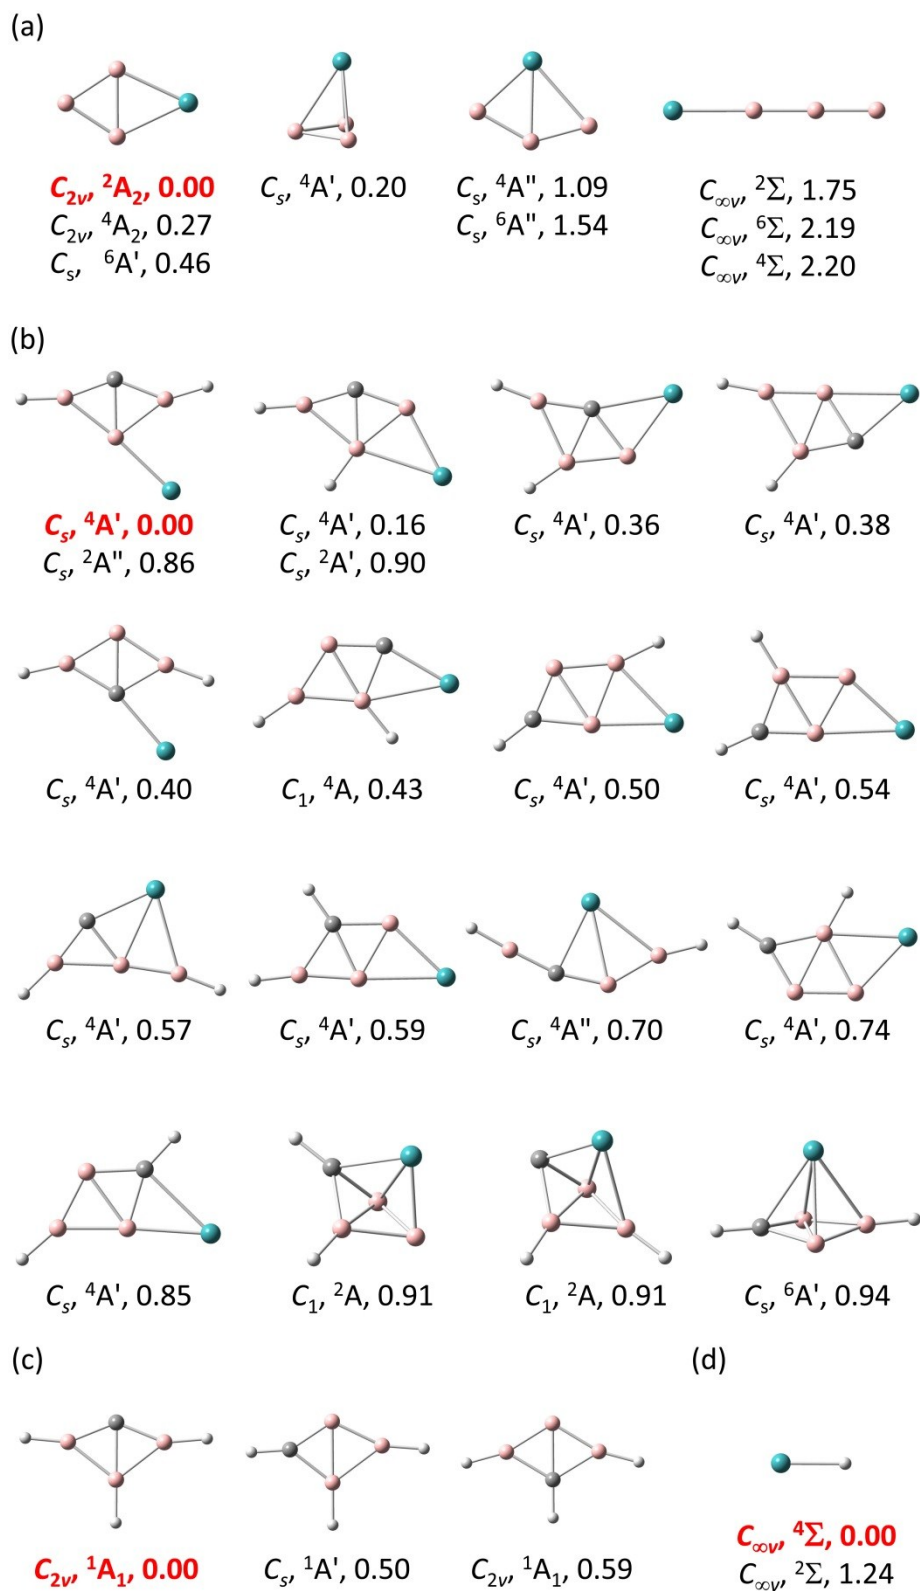

**Figure S3.** Low-lying isomers of (a)  $VB_3^+$ , (b)  $VB_3CH_2^+$ , (c)  $B_3CH_3$  and (d)  $VH^+$  at M06L/TZVP level. The symmetry, electronic state, and the zero-point vibration corrected energies ( $\Delta H_0$ , in eV) with respect to the most stable isomer are given. The superscript denotes spin multiplicity.

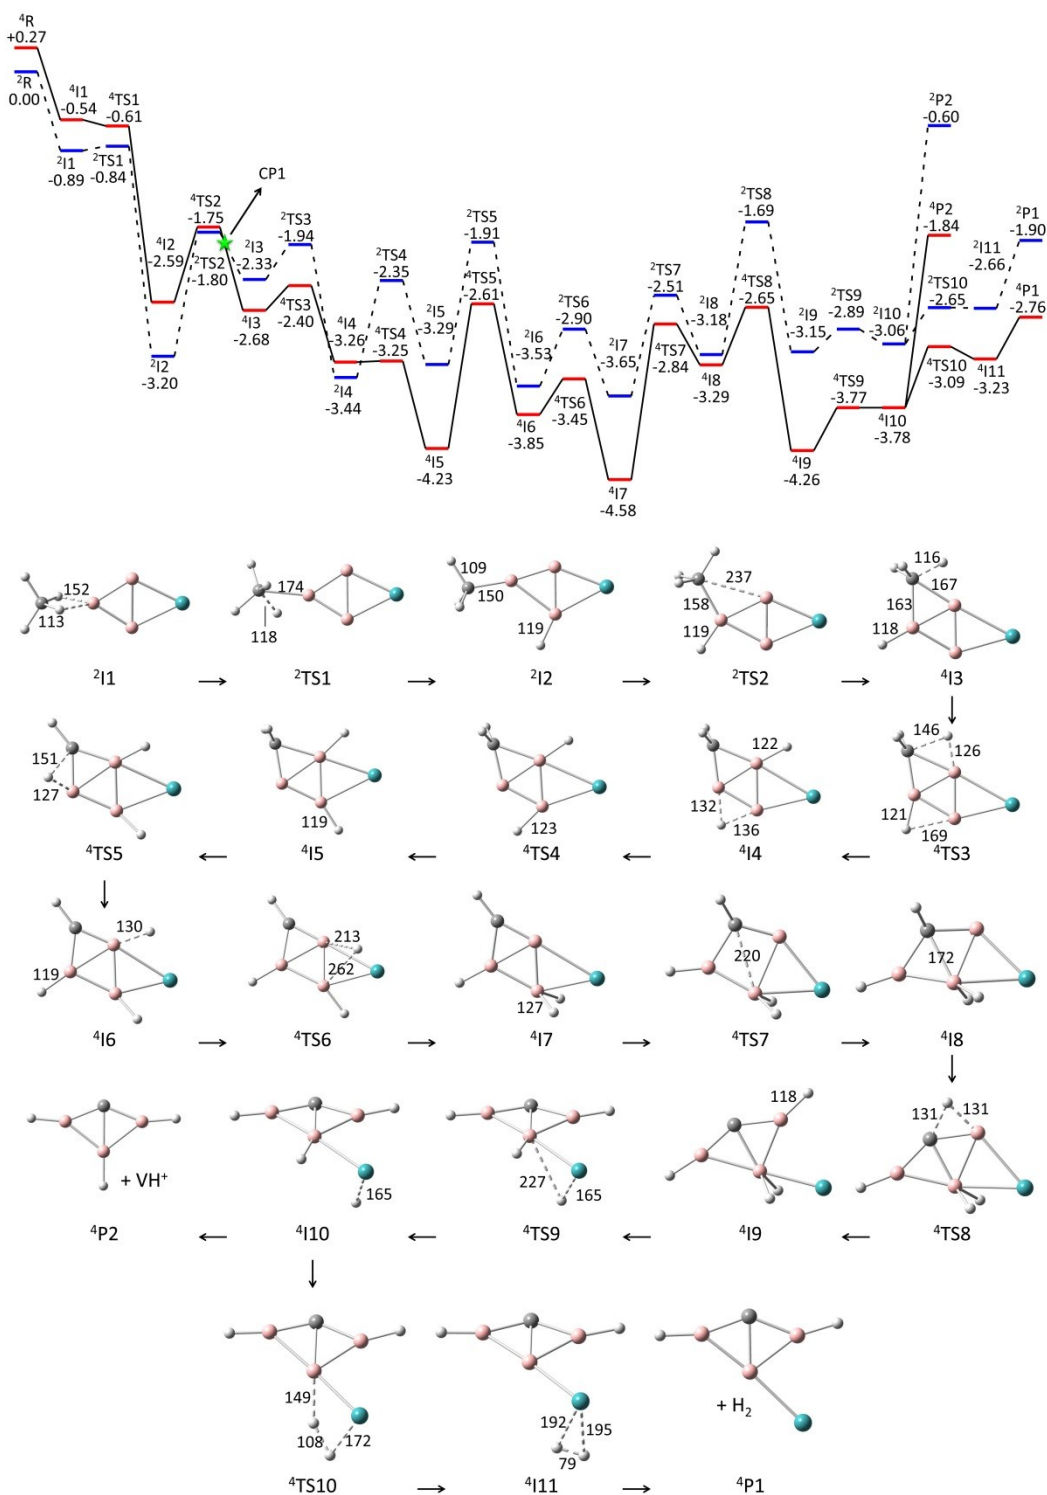

**Figure S4.** DFT calculated potential energy profiles for the reaction of  $\text{VB}_3^+$  with  $\text{CH}_4$  starting from the  $\text{B}_3$  moiety. The superscript denotes spin multiplicity. The structures of the intermediates ( $^2\text{I}1$ – $^2\text{I}2$  and  $^4\text{I}3$ – $^4\text{I}11$ ), transition states ( $^2\text{TS}1$ – $^2\text{TS}2$  and  $^4\text{TS}3$ – $^4\text{TS}10$ ), and products ( $^4\text{P}1$  and  $^4\text{P}2$ ) are shown. The crossing point (CP1) appearing in the spin conversion is shown in Figure S6. The zero-point vibration corrected energies ( $\Delta H_0$ ) with respect to the separated reactants and the bond lengths are given in eV and pm, respectively.

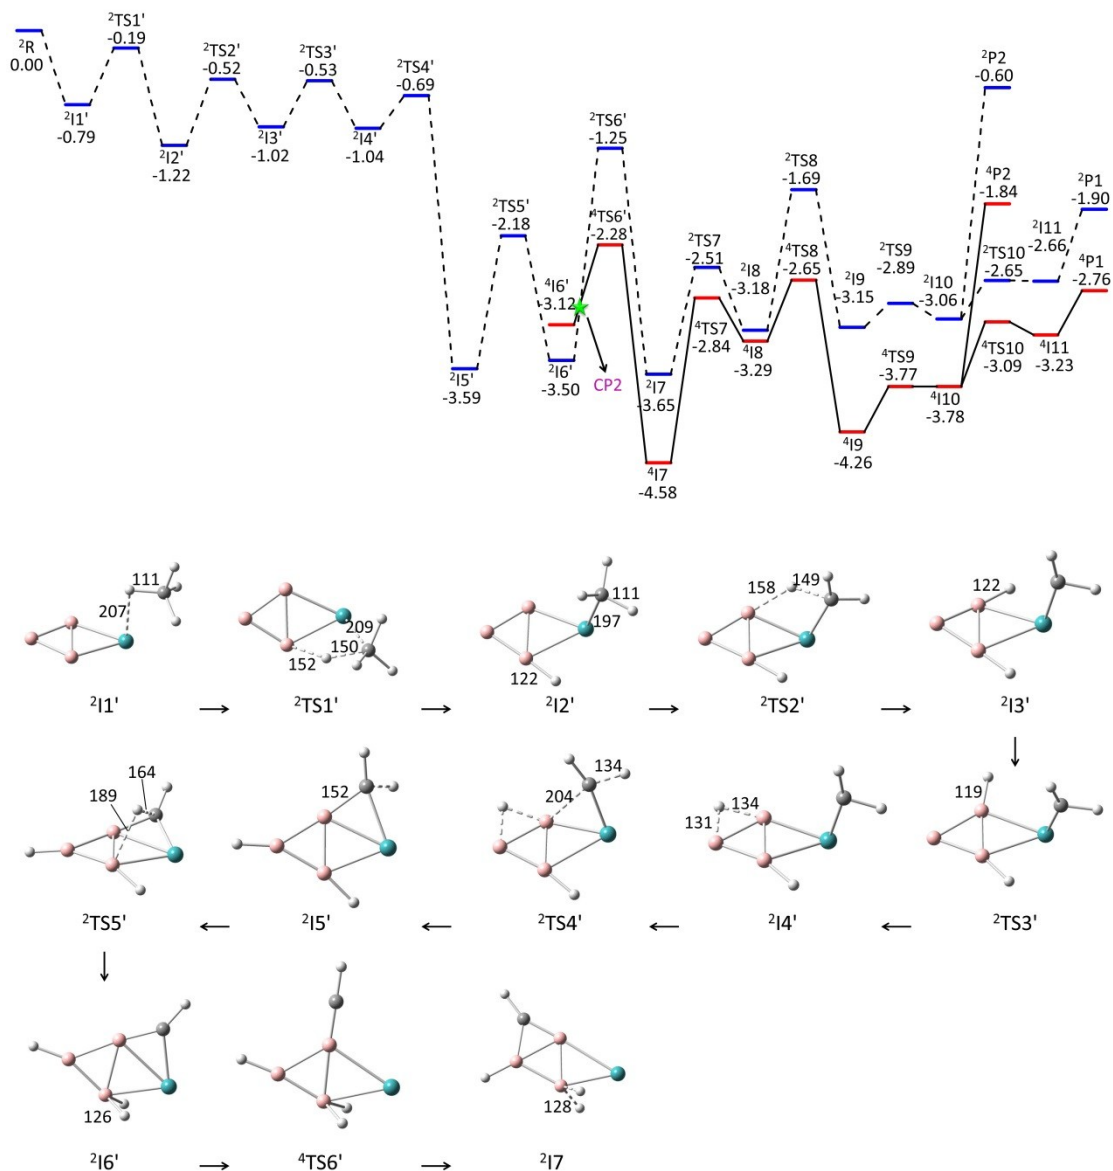

**Figure S5.** DFT calculated potential energy profiles for the reaction of  $\text{VB}_3^+$  with  $\text{CH}_4$  starting from the V side. The superscript denotes spin multiplicity. The structures of the intermediates ( ${}^2\text{I}1'$ – ${}^2\text{I}6'$ ) and transition states ( ${}^2\text{TS}1'$ – ${}^2\text{TS}5'$  and  ${}^4\text{TS}6'$ ) are shown. The structures of intermediates ( ${}^4\text{I}8'$ – ${}^4\text{I}11'$ ), transition states ( ${}^4\text{TS}7'$ – ${}^4\text{TS}10'$ ), and products ( ${}^4\text{P}1$  and  ${}^4\text{P}2$ ) can be found in Figure S5. The crossing point (CP2) appearing in the spin conversion is shown in Figure S6. The zero-point vibration corrected energies ( $\Delta H_0$ ) with respect to the separated reactants and the bond lengths are given in eV and pm, respectively.



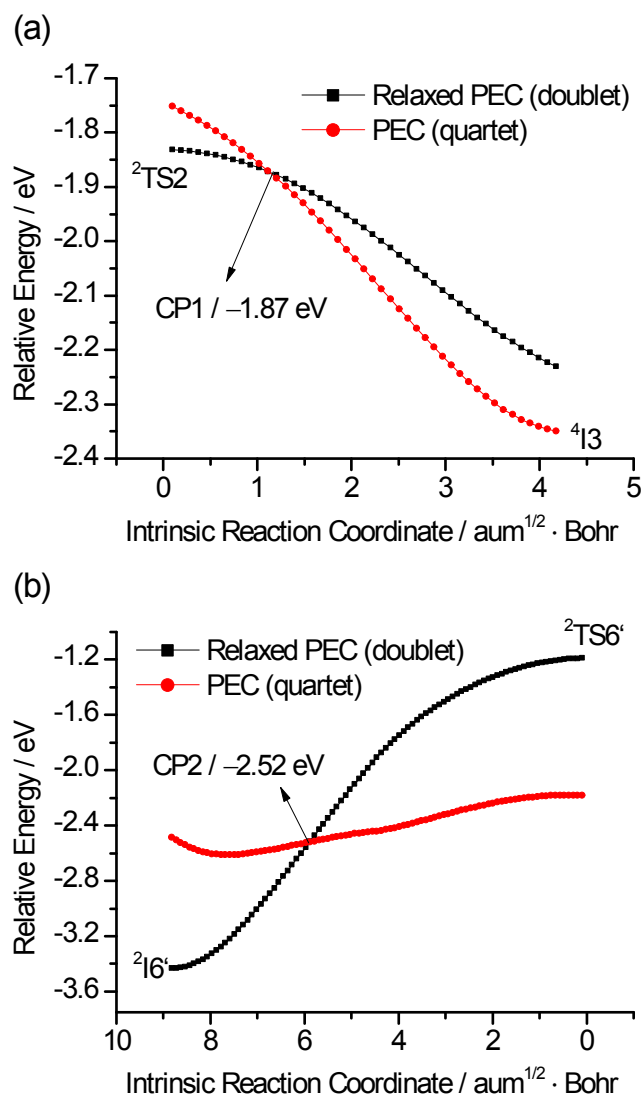

**Figure S6.** DFT-calculated potential-energy curves (PECs) for spin conversions in Figures S4 and S5. The filled square lines in (a-b) are the relaxed PECs obtained by IRC calculations starting from  ${}^2\text{TS2}$  to  ${}^2\text{I3}$  and  ${}^2\text{TS6}'$  to  ${}^2\text{I6}'$ , respectively. The optimized geometries from the filled square line (doublet) in (a-b) were used for single-point energy calculations of the quartet (filled circle line), respectively. The energies of the crossing points (CP1 and CP2) relative to the separated reactants ( ${}^2\text{VB}_3^+ + \text{CH}_4$ ) are given.

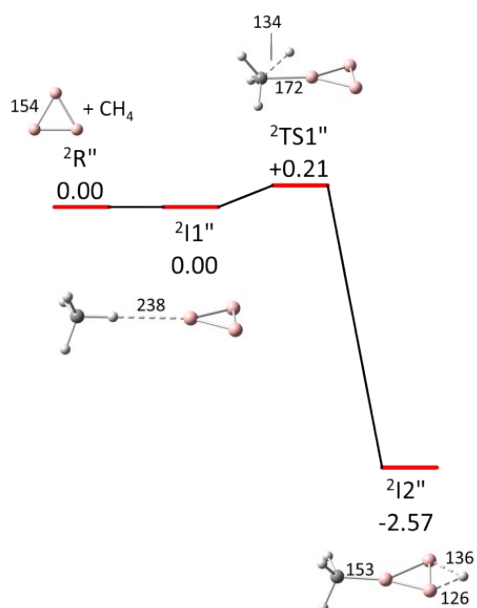

**Figure S7.** DFT calculated potential energy profile for the reaction of neutral B<sub>3</sub> cluster with CH<sub>4</sub>. The superscript denotes spin multiplicity. The zero-point vibration corrected energies ( $\Delta H_0$ ) with respect to the separated reactants and the bond lengths are given in eV and pm, respectively.

## References

- S1 a) X.-N. Wu, J.-B. Ma, B. Xu, Y.-X. Zhao, X.-L. Ding and S.-G. He, *J. Phys. Chem. A* 2011, **115**, 5238-5246. b) X.-N. Wu, B. Xu, J.-H. Meng and S.-G. He, *Int. J. Mass Spectrom.*, 2012, **310**, 57-64.
- S2 Z. Yuan, Y.-X. Zhao, X.-N. Li and S.-G. He, *Int. J. Mass Spectrom.*, 2013, **354-355**, 105-112.
- S3 Z. Yuan, Z.-Y. Li, Z.-X. Zhou, Q.-Y. Liu, Y.-X. Zhao and S.-G. He, *J. Phys. Chem. C*, 2014, **118**, 14967-14976.
- S4 M. J. Frisch, G. W. Trucks, H. B. Schlegel, G. E. Scuseria, M. A. Robb, J. R. Cheeseman, G. Scalmani, V. Barone, B. Mennucci, G. A. Petersson, H. Nakatsuji, M. Caricato, X. Li, H. P. Hratchian, A. F. Izmaylov, J. Bloino, G. Zheng, J. L. Sonnenberg, M. Hada, M. Ehara, K. Toyota, R. Fukuda, J. Hasegawa, M. Ishida, T. Nakajima, Y. Honda, O. Kitao, H. Nakai, T. Vreven, J. A. Montgomery, Jr., J. E. Peralta, F. Ogliaro, M. Bearpark, J. J. Heyd, E. Brothers, K. N. Kudin, V. N. Staroverov, R. Kobayashi, J. Normand, K. Raghavachari, A. Rendell, J. C. Burant, S. S. Iyengar, J. Tomasi, M. Cossi, N. Rega, J. M. Millam, M. Klene, J. E. Knox, J. B. Cross, V. Bakken, C. Adamo, J. Jaramillo, R. Gomperts, R. E. Stratmann, O. Yazyev, A. J. Austin, R. Cammi, C. Pomelli, J. W. Ochterski, R. L. Martin, K. Morokuma, V. G. Zakrzewski, G. A. Voth, P. Salvador, J. J. Dannenberg, S. Dapprich, A. D. Daniels, O. Farkas, J. B. Foresman, J. V. Ortiz, J. Cioslowski and D. J. Fox, *Gaussian 09*, Revision A.1; Gaussian, Inc., Wallingford, CT, 2009.
- S5 A. Schäfer, C. Huber and R. Ahlrichs, *J. Chem. Phys.*, 1994, **100**, 5829-5835.
- S6 J. Alistair Kerr, Strengths of Chemical Bonds. In *Handbook of Chemistry and Physics*, 84th ed.; D. R. Lide, Ed; CRC: Boca Raton, 2003; Sect. 9, pp. 52-64.
- S7 Y. Zhao and D. G. Truhlar, *J. Chem. Phys.*, 2006, **125**, 194101.
- S8 J.-B. Ma, B. Xu, J.-H. Meng, X.-N. Wu, X.-L. Ding, X.-N. Li and S.-G. He, *J. Am. Chem. Soc.* 2013, **135**, 2991-2998.
- S9 I. Berente and G. Naray-Szabo, *The journal of physical chemistry. A*, 2006, **110**, 772-778.
- S10 H. B. Schlegel, *J. Comput. Chem.*, 1982, **3**, 214-218.
- S11 C. Gonzalez and H. B. Schlegel, *J. Chem. Phys.*, 1989, **90**, 2154-2161.
- S12 E. D. Glendening, A. E. Reed, J. E. Carpenter and F. Weinhold, *NBO 3.1*, Theoretical Chemistry Institute, University of Wisconsin, Madison, WI, 1996.
